# Supplementary material for: SLC38A8 mutations result in arrested retinal development with loss of cone photoreceptor specialization
Source: PubMed Central journal article supplement (PMC7645707; doi:10.1093/hmg/ddaa166), 2020-08-03
Supplement: supplementary_figure_2_splice_analysis_ddaa166.pdf [file supplementary_figure_2_splice_analysis_ddaa166.pdf]

## Supplementary Figure 2: c. 1214+5G>C – splice analysis

|                             | Exon 9                          | ← Intron 9 →                 | Exon 10                           |
|-----------------------------|---------------------------------|------------------------------|-----------------------------------|
| <b>Wild type</b>            | CAA gtaa <b>g</b> gtgc -----    |                              | cacttggcag GTG                    |
| MaxEntScan (log odds)       | 10.08                           | wild-type Enhancer motif     | 6.97                              |
| NNSPLICE 0.9 (0-1)          | 0.99                            | SRp55 (value: 74.12 (0-100)) | 0.78                              |
| Human Splice Finder (0-100) | 89.42                           |                              | 90.75                             |
| <b>Mutated</b>              | CAA gtaa <b>c</b> gtgc -----    |                              | cacttggcag GTG                    |
| MaxEntScan (log odds)       | 4.45                            | mutated Enhancer motif       | 6.97                              |
| NNSPLICE 0.9 (0-1)          | 0.69                            | SRp55 (value: 0 site broken) | 0.78                              |
| Human Splice Finder (0-100) | 77.41                           |                              | 90.75                             |
|                             | wild-type donor site:<br>broken |                              | predicted<br>splice acceptor site |
